# Supplementary material for: A Genetics-First Approach to Dissecting the Heterogeneity of Autism: Phenotypic Comparison of Autism Risk Copy Number Variants
Source: bioRxiv or medRxiv preprint supplement (doi:10.1101/2020.01.14.20017426), 2020-10-05
Supplement: Supplementary file [file 2020.01.14.20017426-1.pdf]

## Supplementary Materials

**Supplementary Table 1: Number of participants at each site**

| Research Centre                              | Number of individuals contributed |                     |                  |                     |
|----------------------------------------------|-----------------------------------|---------------------|------------------|---------------------|
|                                              | 16p11.2 deletion                  | 16p11.2 duplication | 22q11.2 deletion | 22q11.2 duplication |
| Cardiff University ECHO & IMAGINE-ID cohorts | 9                                 | 8                   | 68               | 12                  |
| Belgrade University Childrens Hospital       |                                   |                     | 8                | 1                   |
| Childrens Hopsital of Philadelphia           |                                   |                     |                  | 18                  |
| 16p11.2 European consortium                  | 4                                 | 9                   |                  |                     |
| Simons VIP                                   | 70                                | 33                  |                  |                     |
| University of California, Los Angeles        |                                   |                     | 75               | 22                  |
| University Medical Center Utrecht            |                                   |                     | 141              |                     |
| The State University of New York             |                                   |                     | 88               |                     |

### ADI-R

Following previous studies<sup>27,34,45</sup> we only analysed the scores that contributed to the diagnostic algorithm, the majority of which are early developmental “ever/most abnormal” items cohort<sup>34</sup>. The social domain comprises four domains: ‘social interaction’, ‘peer relationships’, ‘shared enjoyment’ and ‘socioemotional reciprocity’ subdomains. For the communication domain we excluded subdomains that were designed only for verbal individuals and only retained those available for both verbal and nonverbal individuals, which were ‘gesture’ and ‘imitation and imagination’ subdomains. This followed the approach of a previous study that examined subdomain scores<sup>45</sup>. The RRB domain comprises ‘repetitive behaviour’, ‘routines and rituals’, ‘motor mannerisms’ (hand and finger mannerisms, and stereotyped body movements) and ‘sensorimotor interest’ (unusual sensory interests and repetitive use of objects) subdomains. All ADI-R assessors were extensively trained to research reliability standards and each site used consensus coding procedures.

### Analysis of covariance models

*Autism severity:* ANCOVA with ADI-R total score as the phenotypic outcome. *Autism domain profile:* multivariate analysis of covariance (MANCOVA) with social, communication and repetitive behaviour ADI-R domain total scores as the phenotypic outcomes entered into the same model. *Autism subdomain profile:* MANCOVA model with ADI-R social subdomains (social interaction, peer relationships, shared enjoyment and socioemotional reciprocity), ADI-R communication subdomains (gestures, imagination and imitation), ADI-R repetitive behaviour subdomains (unusual interests, routines and rituals, motor mannerisms and sensorimotor mannerisms) as phenotypic outcomes entered into the same model. *Cognitive profile:* ANCOVA model with FSIQ as the phenotypic outcome, and a further MANCOVA model with PIQ and VIQ as phenotypic outcomes entered into the same model.

**Supplementary Table 2: Proportion of CNV carriers who met clinical cut-offs for the three autism domains**

|                     | Social | Communication | RRB |
|---------------------|--------|---------------|-----|
| 16p11.2 deletion    | 60%    | 73%           | 59% |
| 16p11.2 duplication | 72%    | 74%           | 86% |
| 22q11.2 deletion    | 47%    | 46%           | 32% |
| 22q11.2 duplication | 55%    | 66%           | 60% |

RRB: repetitive and restrictive behaviour

**Supplementary Figure 1: Proportion of CNV carriers who met clinical cut-offs for the three autism domains**

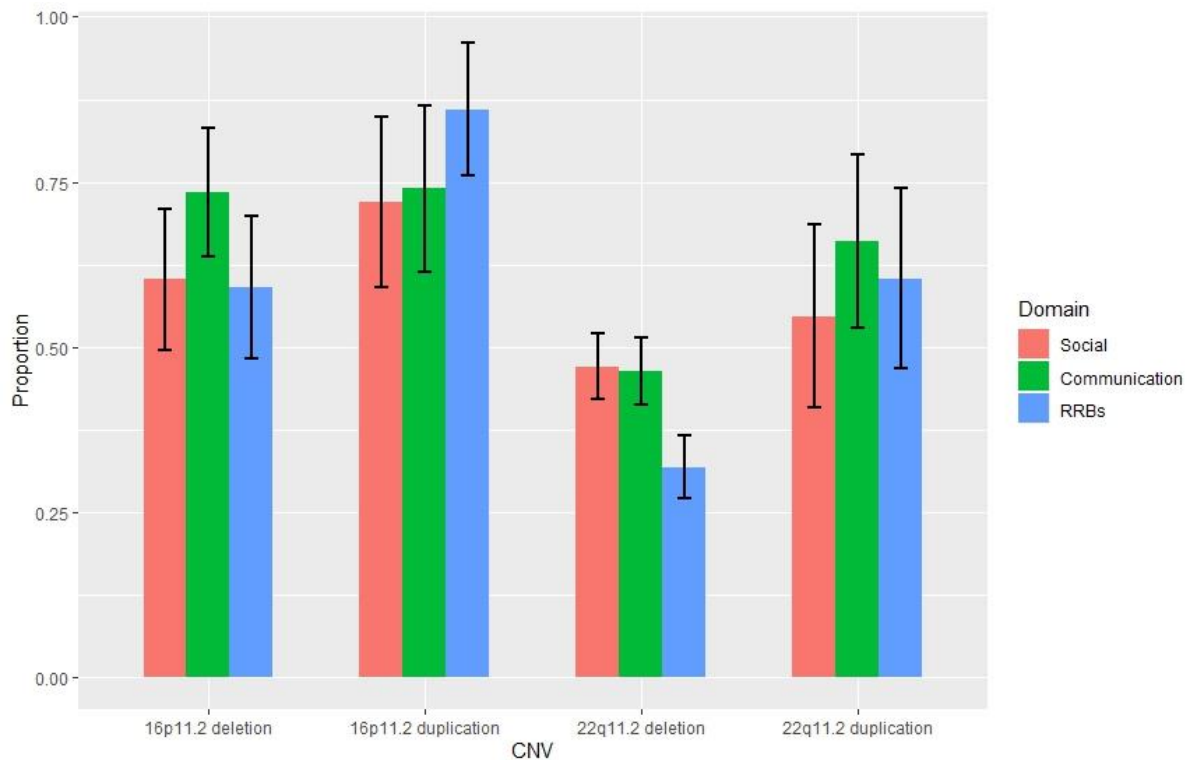

Error bars indicate 95% confidence intervals. RRB: repetitive and restrictive behaviour.

**Supplementary Figure 2: Distribution of total ADI-R score, autism domain scores, and FSIQ by genetic variant group**

The range of scores for total ADI-R scores is highly overlapping between groups (16p11.2 deletion, 3 to 48; 16p11.2 duplication, 0 to 53; 22q11.2 deletion, 0 to 48; 22q11.2 duplication, 0 to 48).

Similarly, the IQ ranges overlap (16p11.2 deletion, 42 - 122; 16p11.2 duplication, 28 - 108; 22q11.2 deletion, 42 - 117; 22q11.2 duplication, 30 - 132).

For IQ we found greater variability for duplications than deletions for both 16p11.2 (Levene's test,  $p < 0.001$ ) and 22q11.2 (Levene's test,  $p < 0.001$ ) loci. For autism severity we found greater variability in outcome for duplications than deletions for the 22q11.2 locus (Levene's test,  $p < 0.001$ ) but not for the 16p11.2 locus (Levene's test,  $p = 0.086$ ).

Straight lines indicate group mean.

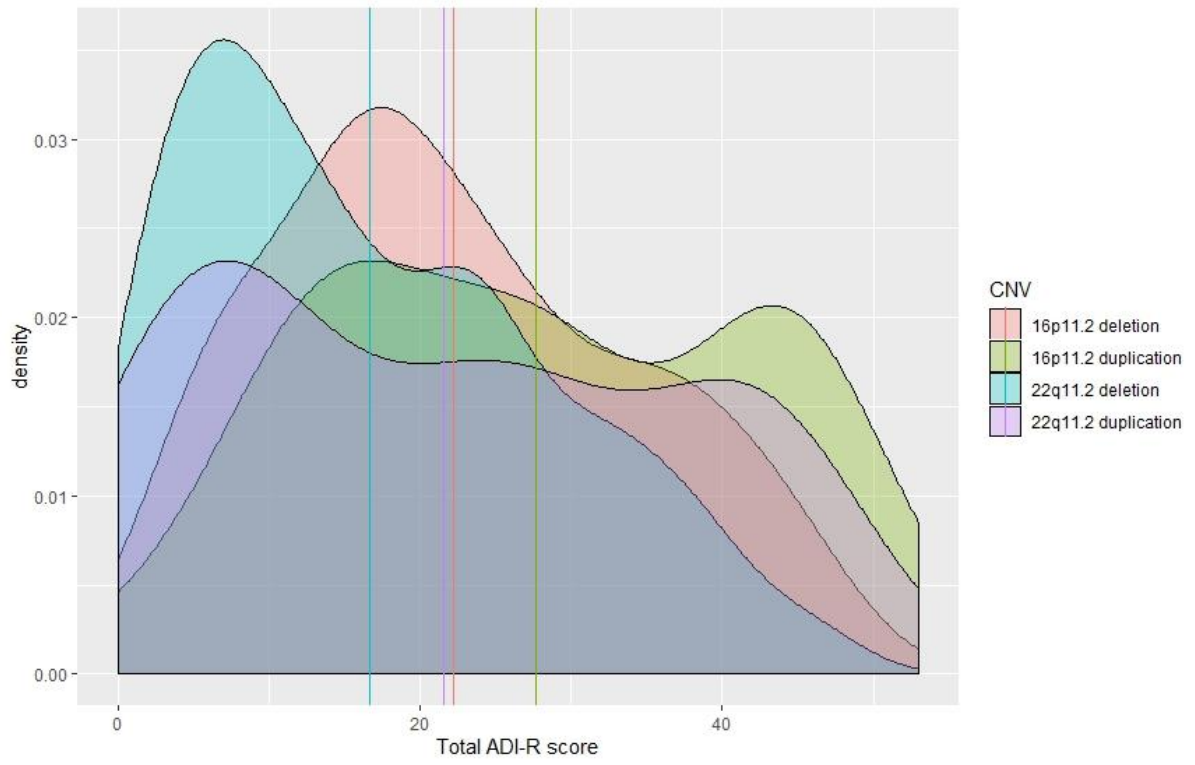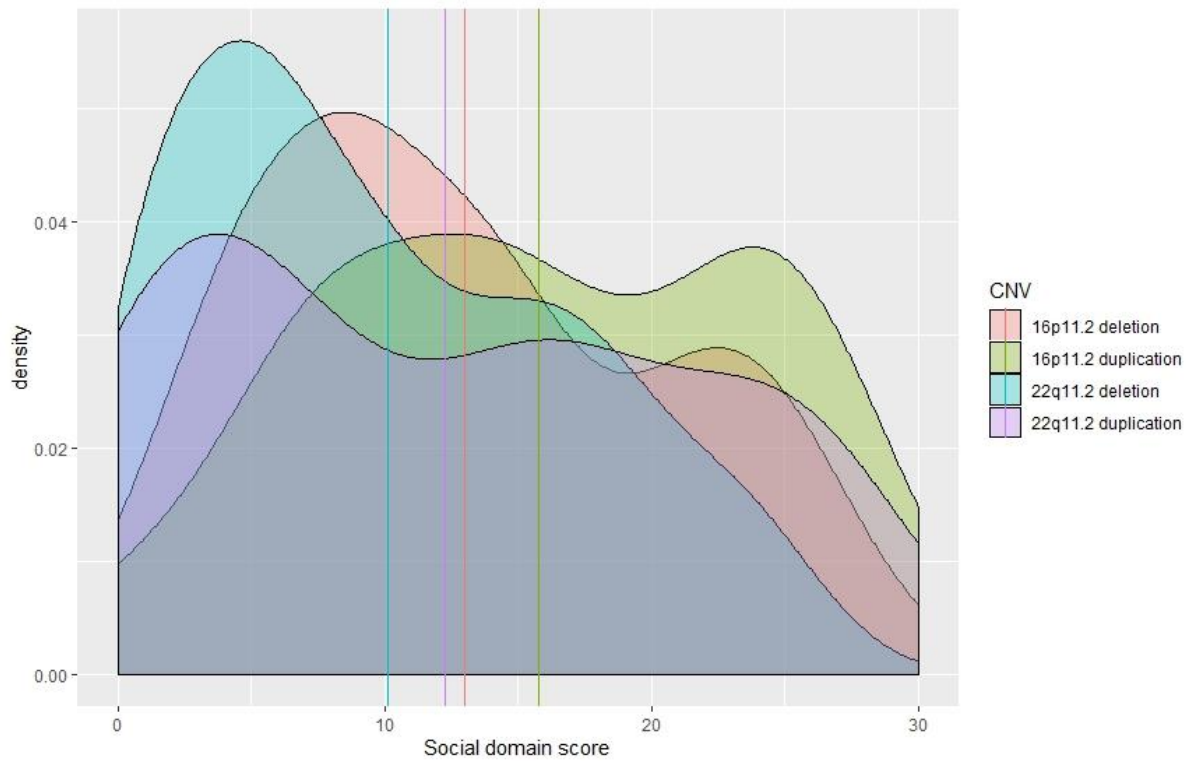

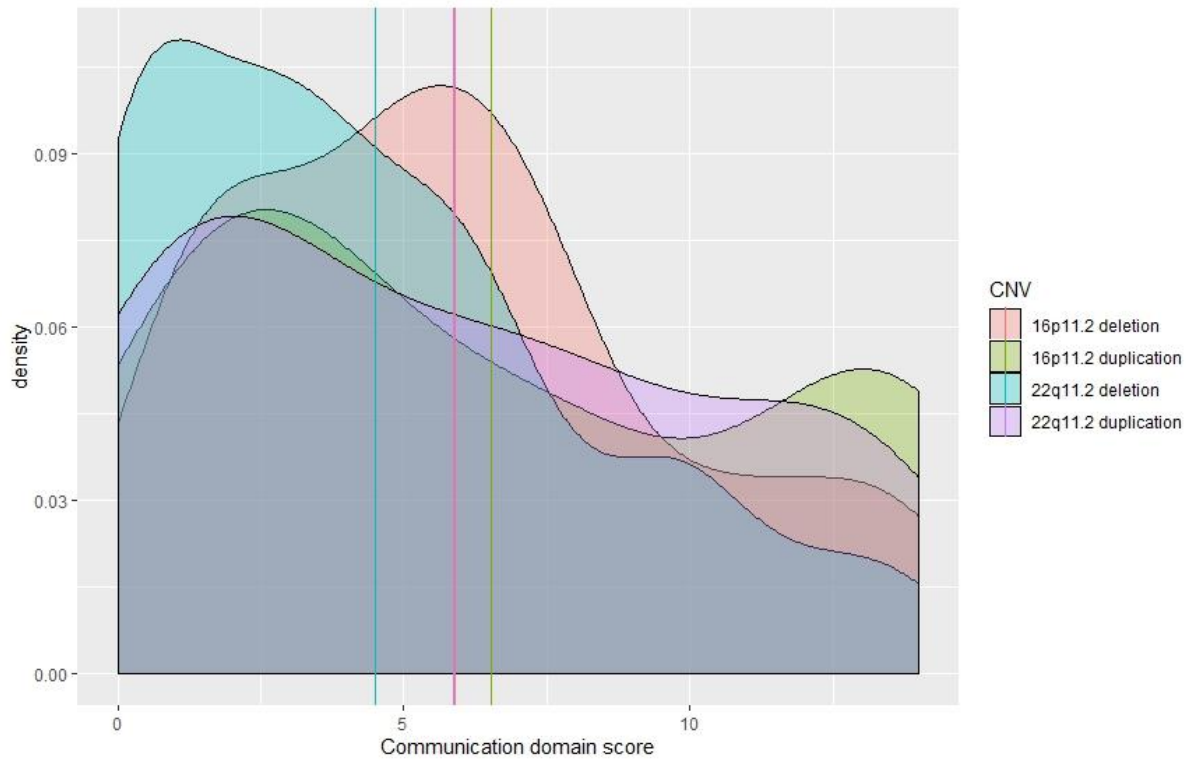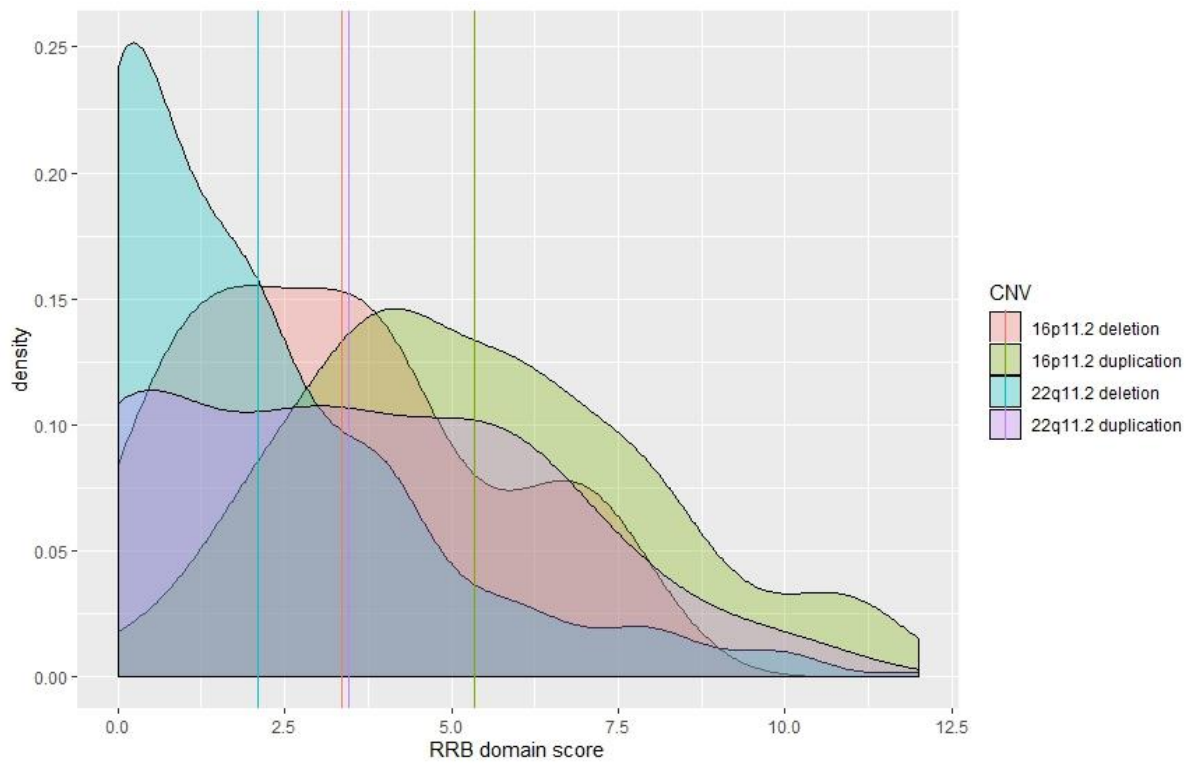

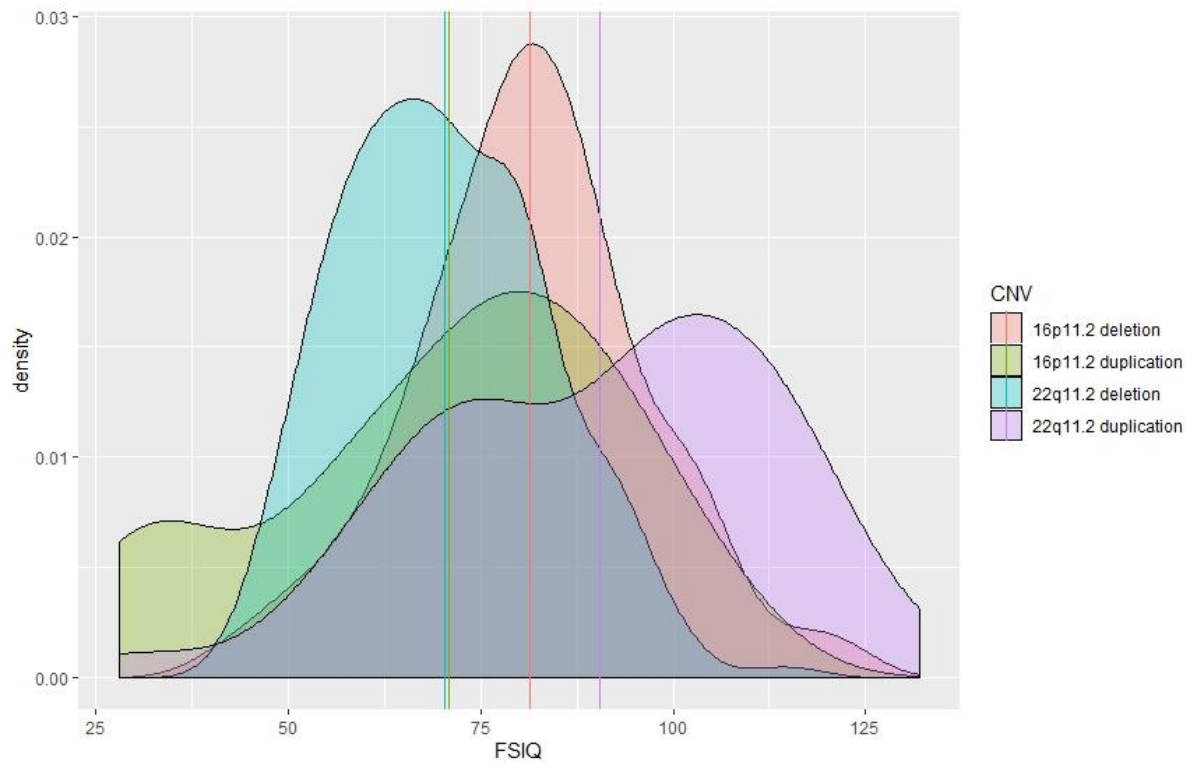

**Supplementary Table 3:** Between group variance adjusted for FSIQ

| Score                       | Between group variation controlled for FSIQ |               |
|-----------------------------|---------------------------------------------|---------------|
| ADI-R scores                | p-value                                     | eta-squared % |
| <b>Total score</b>          | <b>&lt;0.001</b>                            | 8.1           |
| <b>Social domain</b>        | <b>&lt;0.001</b>                            | 5.9           |
| <i>subdomains:</i>          |                                             |               |
| Social interaction          | 0.056                                       | 1.4           |
| Peer relationships          | <b>&lt;0.001</b>                            | 3.4           |
| Shared enjoyment            | <b>&lt;0.001</b>                            | 6.0           |
| Socioemotional reciprocity  | <b>&lt;0.001</b>                            | 8.2           |
| <b>Communication domain</b> | <b>&lt;0.001</b>                            | 3.7           |
| <i>subdomains:</i>          |                                             |               |
| Gestures                    | <b>&lt;0.001</b>                            | 4.1           |
| Imagination & Imitation     | <b>0.006</b>                                | 2.2           |
| <b>RRB domain</b>           | <b>&lt;0.001</b>                            | 15.9          |
| <i>subdomains</i>           |                                             |               |
| Unusual interests           | <b>&lt;0.001</b>                            | 4.7           |
| Routines & rituals          | <b>&lt;0.001</b>                            | 3.5           |
| Motor mannerisms            | <b>&lt;0.001</b>                            | 22.9          |
| Sensorimotor interests      | <b>&lt;0.001</b>                            | 19.1          |

**Supplementary Table 4:** Phenotypic posthoc contrasts between genetic variant groups

Arrows indicate the direction of effect of the difference between genetic variant groups; an upward arrow  $\uparrow$  indicates that the first group mentioned in the pair has a higher value than the second group mentioned; a downward arrow  $\downarrow$  indicates the opposite; no arrow indicates that the values were the same between groups. For example for FSIQ, 16p11.2 duplication carriers have a lower FSIQ than 16p11.2 deletion carriers. Tukey's method was used to conduct posthoc contrasts between CNV groups, producing p-values adjusted for the number of contrasts. Green highlighted cells indicate a significant contrast.

| Phenotypic trait           | 16p11.2 duplication-16p11.2 deletion | 22q11.2 deletion-16p11.2 deletion | 22q11.2 duplication-16p11.2 deletion | 22q11.2 deletion-16p11.2 duplication | 22q11.2 duplication-16p11.2 duplication | 22q11.2 duplication-22q11.2 deletion |
|----------------------------|--------------------------------------|-----------------------------------|--------------------------------------|--------------------------------------|-----------------------------------------|--------------------------------------|
| FSIQ                       | $\downarrow$ 7.08E-04                | $\downarrow$ 4.07E-08             | $\uparrow$ 1.20E-02                  | $\downarrow$ 9.97E-01                | $\uparrow$ 1.61E-08                     | $\downarrow$ 1.85E-10                |
| VIQ                        | $\downarrow$ 3.72E-01                | $\downarrow$ 3.85E-02             | $\uparrow$ 3.18E-02                  | $\downarrow$ 9.94E-01                | $\uparrow$ 7.74E-04                     | $\downarrow$ 3.05E-06                |
| PIQ                        | $\downarrow$ 9.49E-06                | $\downarrow$ 2.99E-10             | $\uparrow$ 9.43E-01                  | $\uparrow$ 9.97E-01                  | $\uparrow$ 3.27E-05                     | $\downarrow$ 1.77E-07                |
| Total ADI-R score          | $\uparrow$ 6.48E-02                  | $\downarrow$ 1.10E-03             | $\downarrow$ 9.90E-01                | $\downarrow$ 2.58E-08                | $\downarrow$ 5.70E-02                   | $\downarrow$ 3.32E-02                |
| Social domain              | $\uparrow$ 1.56E-01                  | $\downarrow$ 7.37E-03             | $\downarrow$ 9.43E-01                | $\downarrow$ 2.99E-06                | $\downarrow$ 7.74E-02                   | $\downarrow$ 1.95E-01                |
| Social interaction         | $\uparrow$ 4.69E-01                  | $\downarrow$ 8.62E-01             | 1.00E+00                             | $\downarrow$ 8.72E-02                | $\uparrow$ 5.40E-01                     | $\downarrow$ 9.26E-01                |
| Peer relationships         | $\uparrow$ 3.66E-01                  | $\downarrow$ 7.24E-02             | $\downarrow$ 8.09E-01                | $\downarrow$ 6.44E-04                | $\downarrow$ 1.06E-01                   | $\downarrow$ 7.84E-01                |
| Shared enjoyment           | $\uparrow$ 2.56E-01                  | $\downarrow$ 2.79E-03             | 1.00E+00                             | $\downarrow$ 4.35E-06                | $\downarrow$ 3.38E-01                   | $\downarrow$ 2.09E-02                |
| Socioemotional reciprocity | $\uparrow$ 1.22E-01                  | $\downarrow$ 2.30E-04             | $\downarrow$ 8.38E-01                | $\downarrow$ 2.61E-08                | $\downarrow$ 3.11E-02                   | $\downarrow$ 7.38E-02                |
| Communication domain       | $\uparrow$ 8.00E-01                  | $\downarrow$ 1.72E-02             | 1.00E+00                             | $\downarrow$ 3.25E-03                | $\downarrow$ 8.19E-01                   | $\downarrow$ 8.26E-02                |
| Gestures                   | $\uparrow$ 3.79E-01                  | $\downarrow$ 9.68E-02             | $\uparrow$ 5.88E-01                  | $\downarrow$ 1.05E-03                | $\downarrow$ 9.88E-01                   | $\downarrow$ 3.71E-03                |
| Imagination & Imitation    | $\uparrow$ 9.98E-01                  | $\downarrow$ 1.56E-02             | $\downarrow$ 3.49E-01                | $\downarrow$ 1.25E-01                | $\downarrow$ 5.52E-01                   | $\downarrow$ 9.63E-01                |
| RRB domain                 | $\uparrow$ 1.98E-05                  | $\downarrow$ 8.57E-05             | $\uparrow$ 9.95E-01                  | $\downarrow$ 4.58E-10                | $\downarrow$ 3.50E-04                   | $\downarrow$ 5.94E-04                |
| Unusual interests          | $\uparrow$ 1.36E-04                  | 9.91E-01                          | $\uparrow$ 9.76E-01                  | $\downarrow$ 1.02E-05                | $\downarrow$ 2.75E-03                   | $\downarrow$ 9.95E-01                |
| Routines & rituals         | $\uparrow$ 2.45E-03                  | 9.77E-01                          | $\uparrow$ 2.89E-01                  | $\downarrow$ 6.72E-04                | $\downarrow$ 3.60E-01                   | $\downarrow$ 2.83E-01                |
| Motor mannerisms           | $\uparrow$ 8.62E-02                  | $\uparrow$ 4.58E-10               | 9.97E-01                             | $\downarrow$ 4.58E-10                | $\downarrow$ 9.50E-02                   | $\downarrow$ 3.46E-09                |
| Sensorimotor interests     | $\uparrow$ 9.56E-02                  | $\uparrow$ 4.58E-10               | $\downarrow$ 1.45E-01                | $\downarrow$ 4.58E-10                | $\downarrow$ 4.14E-04                   | $\downarrow$ 2.87E-04                |

**Supplementary Table 5:** Comparison of autism in the genetic variant groups to the heterogeneous autism group in terms of IQ and symptom domains

FSIQ, Full Scale Intelligence Quotient; VIQ, Verbal Intelligence Quotient; PIQ, Performance Intelligence Quotient ; ADI-R, Autism Diagnostic Interview.

Separate MANCOVA analyses were ran for domain and subdomain scores to avoid including mathematically related scores in the same analysis. Total ADI-R score was analysed separately using an ANCOVA model. Age, gender and site were included as covariates.



| Score                                         | Heterogeneous autism |      | 16p11.2 deletion |    | differ from heterogeneous autism p-value |      | 16p11.2 duplication |      | differ from heterogeneous autism p-value |        | 22q11.2 deletion |      | differ from heterogeneous autism p-value |      | 22q11.2 duplication |      | differ from heterogeneous autism p-value |    | 5-Group difference MANCOVA p-value |      |    |      |     |       |        |
|-----------------------------------------------|----------------------|------|------------------|----|------------------------------------------|------|---------------------|------|------------------------------------------|--------|------------------|------|------------------------------------------|------|---------------------|------|------------------------------------------|----|------------------------------------|------|----|------|-----|-------|--------|
|                                               | N                    | mean | sd               | N  | mean                                     | sd   | N                   | mean | sd                                       | N      | mean             | sd   | N                                        | mean | sd                  | N    | mean                                     | sd | N                                  | mean | sd |      |     |       |        |
| <b>Cognitive scores</b>                       |                      |      |                  |    |                                          |      |                     |      |                                          |        |                  |      |                                          |      |                     |      |                                          |    |                                    |      |    |      |     |       |        |
| FSIQ                                          | 948                  | 76.0 | 25.3             | 34 | 79.1                                     | 15.8 | 29                  | 66.2 | 21.8                                     | 0.937  | 75               | 69.1 | 14.2                                     | 18   | 87.7                | 26.1 | 0.087                                    | 88 | 31.9                               | 7.5  | 24 | 35.6 | 8.4 | 0.225 | 0.002  |
| VIQ                                           | 1135                 | 78.4 | 27.5             | 34 | 76.2                                     | 19.5 | 29                  | 68.7 | 23.6                                     | 0.989  | 74               | 69.9 | 14.0                                     | 18   | 83.7                | 21.7 | 0.047                                    | 88 | 18.2                               | 4.7  | 24 | 20.3 | 5.0 | 0.367 | 0.045  |
| PIQ                                           | 1297                 | 83.5 | 24.9             | 35 | 82.6                                     | 15.9 | 29                  | 68.2 | 23.0                                     | 0.999  | 75               | 72.9 | 16.7                                     | 19   | 87.8                | 23.0 | 0.002                                    | 88 | 5.1                                | 1.8  | 24 | 5.8  | 2.0 | 0.197 | <0.001 |
| <b>ADI-R scores</b>                           |                      |      |                  |    |                                          |      |                     |      |                                          |        |                  |      |                                          |      |                     |      |                                          |    |                                    |      |    |      |     |       |        |
| <b>Total score</b>                            | 2027                 | 39.1 | 8.2              | 36 | 31.8                                     | 8.6  | 29                  | 36.7 | 9.6                                      | <0.001 | 88               | 31.9 | 7.5                                      | 24   | 35.6                | 8.4  | <0.001                                   | 88 | 8.4                                | 3.0  | 24 | 9.5  | 3.6 | 0.578 | <0.001 |
| <b>Social domain subdomains:</b>              | 2027                 | 22.2 | 5.1              | 36 | 18.6                                     | 5.7  | 29                  | 20.7 | 5.5                                      | <0.001 | 88               | 18.2 | 4.7                                      | 24   | 20.3                | 5.0  | <0.001                                   | 88 | 3.6                                | 2.5  | 24 | 5.0  | 2.4 | 0.891 | <0.001 |
| Social interaction                            | 2027                 | 4.2  | 1.6              | 36 | 3.4                                      | 1.7  | 29                  | 3.7  | 2.0                                      | 0.025  | 88               | 4.0  | 1.6                                      | 24   | 4.3                 | 1.4  | 0.752                                    | 88 | 4.8                                | 1.3  | 24 | 4.4  | 1.5 | 0.323 | 0.010  |
| Peer relationships                            | 2027                 | 6.6  | 1.6              | 36 | 5.6                                      | 1.7  | 29                  | 6.6  | 1.2                                      | 0.002  | 88               | 5.8  | 1.5                                      | 24   | 5.9                 | 1.4  | <0.001                                   | 88 | 5.1                                | 1.8  | 24 | 5.8  | 2.0 | 0.197 | <0.001 |
| Shared enjoyment                              | 2027                 | 4.8  | 1.5              | 36 | 3.8                                      | 2.0  | 29                  | 4.3  | 1.6                                      | <0.001 | 88               | 3.4  | 1.7                                      | 24   | 4.4                 | 1.6  | <0.001                                   | 88 | 3.6                                | 2.5  | 24 | 5.0  | 2.4 | 0.891 | <0.001 |
| Socioemotional reciprocity                    | 2027                 | 6.7  | 2.1              | 36 | 5.8                                      | 2.1  | 29                  | 6.1  | 2.1                                      | 0.117  | 88               | 5.1  | 1.8                                      | 24   | 5.8                 | 2.0  | <0.001                                   | 88 | 4.8                                | 1.3  | 24 | 4.4  | 1.5 | 0.323 | <0.001 |
| <b>Communication domain subdomains:</b>       | 2027                 | 10.4 | 3.1              | 36 | 8.0                                      | 3.5  | 29                  | 9.3  | 3.9                                      | <0.001 | 88               | 8.4  | 3.0                                      | 24   | 9.5                 | 3.6  | <0.001                                   | 88 | 3.6                                | 2.5  | 24 | 5.0  | 2.4 | 0.891 | <0.001 |
| Gestures                                      | 2027                 | 5.5  | 2.4              | 36 | 3.8                                      | 2.5  | 29                  | 4.4  | 2.9                                      | <0.001 | 88               | 3.6  | 2.5                                      | 24   | 5.0                 | 2.4  | <0.001                                   | 88 | 4.8                                | 1.3  | 24 | 4.4  | 1.5 | 0.323 | <0.001 |
| Imagination & Imitation                       | 2027                 | 4.9  | 1.3              | 36 | 4.3                                      | 1.5  | 29                  | 4.9  | 1.5                                      | 0.017  | 88               | 4.8  | 1.3                                      | 24   | 4.4                 | 1.5  | 0.781                                    | 88 | 5.3                                | 2.2  | 24 | 5.8  | 2.0 | 0.636 | 0.007  |
| <b>Repetitive behaviour domain subdomains</b> | 2027                 | 6.5  | 2.3              | 36 | 5.2                                      | 1.7  | 29                  | 6.7  | 2.3                                      | 0.006  | 88               | 5.3  | 2.2                                      | 24   | 5.8                 | 2.0  | <0.001                                   | 88 | 1.8                                | 1.1  | 24 | 1.6  | 1.0 | 0.881 | <0.001 |
| Unusual interests                             | 2027                 | 1.9  | 1.3              | 36 | 1.3                                      | 1.2  | 29                  | 2.0  | 1.0                                      | 0.024  | 88               | 1.8  | 1.1                                      | 24   | 1.6                 | 1.0  | 0.999                                    | 88 | 1.5                                | 1.3  | 24 | 1.4  | 1.2 | 0.995 | 0.040  |
| Routines & rituals                            | 2027                 | 1.5  | 1.3              | 36 | 1.0                                      | 1.2  | 29                  | 1.6  | 1.4                                      | 0.122  | 88               | 1.5  | 1.3                                      | 24   | 1.4                 | 1.2  | 0.999                                    | 88 | 0.7                                | 0.8  | 24 | 1.3  | 0.9 | 0.657 | 0.215  |
| Motor mannerisms                              | 2027                 | 1.5  | 0.7              | 36 | 1.3                                      | 0.9  | 29                  | 1.4  | 0.8                                      | 0.535  | 88               | 0.7  | 0.8                                      | 24   | 1.3                 | 0.9  | <0.001                                   | 88 | 1.2                                | 0.8  | 24 | 1.5  | 0.7 | 0.954 | <0.001 |
| Sensorimotor interests                        | 2027                 | 1.6  | 0.6              | 36 | 1.6                                      | 0.5  | 29                  | 1.7  | 0.5                                      | 0.988  | 88               | 1.2  | 0.8                                      | 24   | 1.5                 | 0.7  | <0.001                                   | 88 | 1.2                                | 0.8  | 24 | 1.5  | 0.7 | 0.954 | <0.001 |
